# Supplementary material for: Renal Protection by Genetic Deletion of the Atypical Chemokine Receptor ACKR2 in Diabetic OVE Mice
Source: Hindawi journal article supplement (doi:10.1155/2016/5362506), 2015-12-20
Supplement: f1 [file 5362506.f1.pdf]

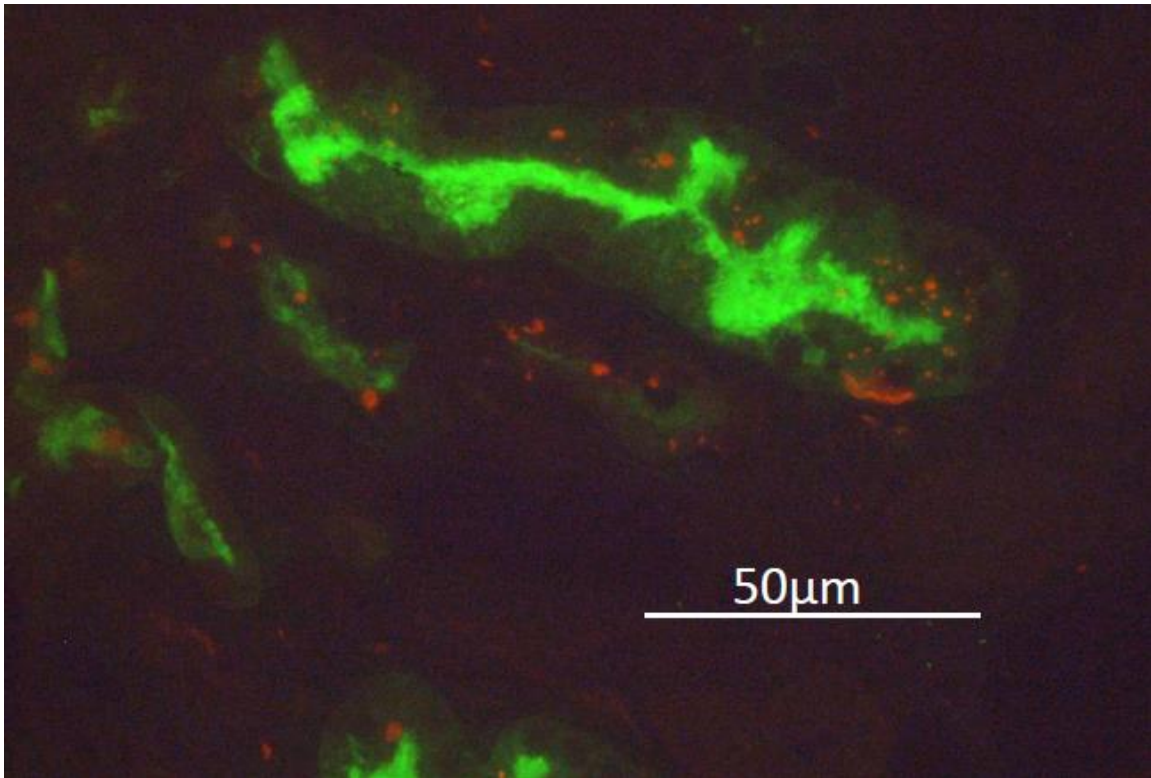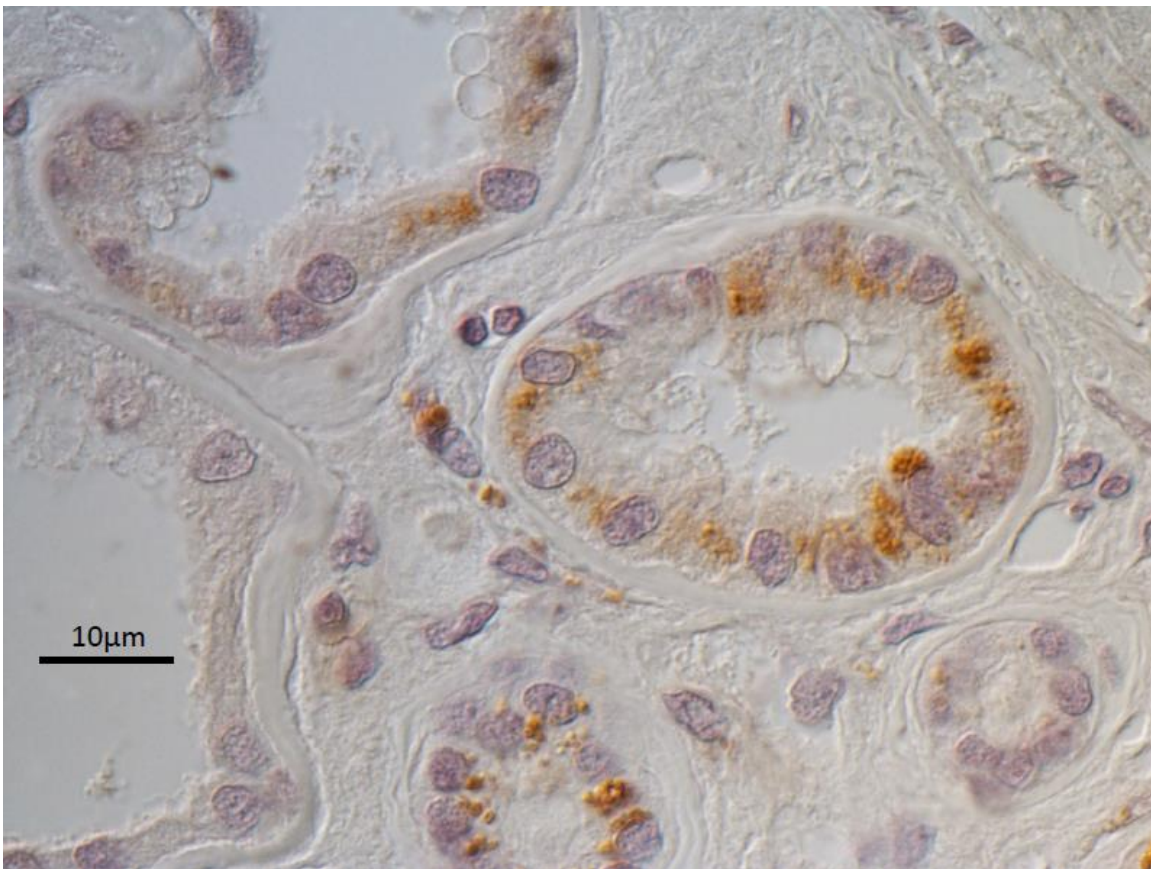

Supplement Figure 1. Most ACKR2 positive cells in diabetic human kidneys are tubule epithelial cells: The upper panel shows ACKR2 staining in red (Cy3) and green labeling of the proximal tubule brush border with FITC labeled *Lotus tetragonolobus* lectin, a specific marker in kidney for tubule epithelial cell brush border [25]. The lower panel is a differential interference contrast (DIC) image clearly showing that the central tubule has an almost continuous brush border adjacent to nearly continuous ACKR2 stained cells. In both images the predominance of ACKR2 staining on cells with a brush border indicates that most ACKR2 stained cells are tubule epithelial cells.

**Supplement Table 1:** 50 transcripts most reduced in OVE-ACKR2 kidney compared to OVE kidney among all OVE-ACKR2 transcripts significantly different from OVE by ANOVA  $P \leq 0.05$ . Values are the average signal  $\pm$ SEM,  $n=3$ .

| RATIO<br>OVE /<br>OVE-<br>ACKR2 | p-value<br>OVE vs<br>OVE-<br>ACKR2 | gene_assignment                             | Gene<br>Symbol | OVE<br>signal   | OVE-<br>ACKR2<br>signal | FVB<br>signal | ACKR2<br>signal |
|---------------------------------|------------------------------------|---------------------------------------------|----------------|-----------------|-------------------------|---------------|-----------------|
| 6.5                             | 0.033                              | immunoglobulin kappa chain variable 1       | Igk-V1         | 693 $\pm$ 412   | 106 $\pm$ 19            | 200 $\pm$ 18  | 106 $\pm$ 19    |
| 5.7                             | 0.003                              | lipocalin 2                                 | Lcn2           | 1663 $\pm$ 772  | 291 $\pm$ 189           | 108 $\pm$ 10  | 291 $\pm$ 189   |
| 5.3                             | 0.043                              | immunoglobulin lambda chain, variable 2     | Igl-V2         | 296 $\pm$ 175   | 56 $\pm$ 6              | 76 $\pm$ 5    | 56 $\pm$ 6      |
| 4.8                             | 0.000                              | chemokine (C-C motif) receptor 2            | Ccr2           | 179 $\pm$ 49    | 37 $\pm$ 2              | 59 $\pm$ 12   | 37 $\pm$ 2      |
| 4.3                             | 0.017                              | lysozyme 1                                  | Lyz1           | 231 $\pm$ 117   | 54 $\pm$ 6              | 40 $\pm$ 4    | 54 $\pm$ 6      |
| 4.3                             | 0.013                              | immunoglobulin kappa chain variable 28      | Igk-V28        | 673 $\pm$ 318   | 157 $\pm$ 16            | 292 $\pm$ 21  | 157 $\pm$ 16    |
| 4.2                             | 0.002                              | lysozyme 2                                  | Lyz2           | 3352 $\pm$ 1161 | 794 $\pm$ 97            | 443 $\pm$ 66  | 794 $\pm$ 97    |
| 4.2                             | 0.022                              | immunoglobulin joining chain                | Igj            | 784 $\pm$ 360   | 189 $\pm$ 12            | 355 $\pm$ 14  | 189 $\pm$ 12    |
| 4.1                             | 0.006                              | serine peptidase inhibitor, clade A 3N      | Serpina3n      | 978 $\pm$ 435   | 240 $\pm$ 65            | 175 $\pm$ 19  | 240 $\pm$ 65    |
| 3.8                             | 0.038                              | immunoglobulin heavy variable V1-72         | Ighv1-72       | 711 $\pm$ 336   | 186 $\pm$ 38            | 289 $\pm$ 7   | 186 $\pm$ 38    |
| 3.8                             | 0.013                              | complement component 7                      | C7             | 1092 $\pm$ 436  | 287 $\pm$ 84            | 247 $\pm$ 15  | 287 $\pm$ 84    |
| 3.8                             | 0.018                              | membrane-spanning 4-domains, A, 6D          | Ms4a6d         | 147 $\pm$ 64    | 39 $\pm$ 5              | 32 $\pm$ 3    | 39 $\pm$ 5      |
| 3.6                             | 0.030                              | ribonuclease P RNA-like 1                   | Rpr1           | 262 $\pm$ 118   | 73 $\pm$ 10             | 123 $\pm$ 11  | 73 $\pm$ 10     |
| 3.5                             | 0.014                              | keratin 20                                  | Krt20          | 137 $\pm$ 81    | 39 $\pm$ 9              | 31 $\pm$ 3    | 39 $\pm$ 9      |
| 3.5                             | 0.033                              | chemokine (C-C motif) ligand 28             | Ccl28          | 805 $\pm$ 337   | 232 $\pm$ 51            | 156 $\pm$ 33  | 232 $\pm$ 51    |
| 3.5                             | 0.011                              | toll-like receptor 8                        | Tlr8           | 88 $\pm$ 37     | 25 $\pm$ 3              | 23 $\pm$ 1    | 25 $\pm$ 3      |
| 3.3                             | 0.001                              | CD44 antigen                                | Cd44           | 290 $\pm$ 111   | 89 $\pm$ 9              | 77 $\pm$ 4    | 89 $\pm$ 9      |
| 3.2                             | 0.008                              | membrane-spanning 4-domains, A, 6C          | Ms4a6c         | 522 $\pm$ 189   | 164 $\pm$ 14            | 127 $\pm$ 10  | 164 $\pm$ 14    |
| 3.1                             | 0.005                              | hepatitis A virus cellular receptor 1       | Havcr1         | 901 $\pm$ 268   | 289 $\pm$ 105           | 180 $\pm$ 24  | 289 $\pm$ 105   |
| 3.1                             | 0.025                              | eosinophil-associated, ribonuclease A 10    | Ear10          | 293 $\pm$ 170   | 94 $\pm$ 10             | 58 $\pm$ 4    | 94 $\pm$ 10     |
| 3.1                             | 0.002                              | interleukin 1 family, member 6              | Il1f6          | 98 $\pm$ 37     | 32 $\pm$ 4              | 28 $\pm$ 2    | 32 $\pm$ 4      |
| 3.0                             | 0.005                              | EGF-like, mucin-like, hormone receptor-like | Emr1           | 291 $\pm$ 93    | 98 $\pm$ 4              | 99 $\pm$ 24   | 98 $\pm$ 4      |
| 3.0                             | 0.001                              | matrix metalloproteinase 12                 | Mmp12          | 197 $\pm$ 74    | 67 $\pm$ 3              | 68 $\pm$ 4    | 67 $\pm$ 3      |
| 2.9                             | 0.005                              | tissue inhibitor of metalloproteinase 1     | Timp1          | 215 $\pm$ 89    | 74 $\pm$ 16             | 52 $\pm$ 2    | 74 $\pm$ 16     |
| 2.9                             | 0.018                              | complement component 1, q C chain           | C1qc           | 492 $\pm$ 193   | 170 $\pm$ 34            | 157 $\pm$ 25  | 170 $\pm$ 34    |
| 2.9                             | 0.009                              | chemokine (C-C motif) ligand 2              | Ccl2           | 254 $\pm$ 121   | 88 $\pm$ 11             | 59 $\pm$ 4    | 88 $\pm$ 11     |
| 2.9                             | 0.001                              | chemokine (C-C motif) ligand 9              | Ccl9           | 221 $\pm$ 69    | 77 $\pm$ 10             | 65 $\pm$ 4    | 77 $\pm$ 10     |
| 2.8                             | 0.037                              | CD74 antigen                                | Cd74           | 3089 $\pm$ 1145 | 1101 $\pm$ 30           | 930 $\pm$ 224 | 1101 $\pm$ 30   |
| 2.8                             | 0.016                              | CD53 antigen                                | Cd53           | 447 $\pm$ 176   | 160 $\pm$ 7             | 123 $\pm$ 3   | 160 $\pm$ 7     |
| 2.8                             | 0.022                              | eosinophil-associated, ribonuclease A 1     | Ear1           | 231 $\pm$ 125   | 83 $\pm$ 7              | 57 $\pm$ 3    | 83 $\pm$ 7      |
| 2.7                             | 0.002                              | vascular cell adhesion molecule 1           | Vcam1          | 650 $\pm$ 206   | 238 $\pm$ 32            | 241 $\pm$ 10  | 238 $\pm$ 32    |
| 2.7                             | 0.023                              | CD209a antigen                              | Cd209a         | 212 $\pm$ 101   | 79 $\pm$ 14             | 84 $\pm$ 13   | 79 $\pm$ 14     |
| 2.6                             | 0.012                              | interleukin 7 receptor                      | Il7r           | 102 $\pm$ 39    | 39 $\pm$ 2              | 37 $\pm$ 1    | 39 $\pm$ 2      |
| 2.6                             | 0.029                              | chemokine (C-C motif) ligand 8              | Ccl8           | 75 $\pm$ 35     | 29 $\pm$ 1              | 24 $\pm$ 1    | 29 $\pm$ 1      |
| 2.6                             | 0.014                              | fibrinogen gamma chain                      | Fgg            | 636 $\pm$ 154   | 246 $\pm$ 96            | 193 $\pm$ 25  | 246 $\pm$ 96    |
| 2.6                             | 0.008                              | macrophage expressed gene 1                 | Mpeg1          | 370 $\pm$ 120   | 144 $\pm$ 8             | 125 $\pm$ 13  | 144 $\pm$ 8     |
| 2.6                             | 0.010                              | cathepsin S                                 | Ctss           | 373 $\pm$ 120   | 145 $\pm$ 11            | 127 $\pm$ 12  | 145 $\pm$ 11    |
| 2.5                             | 0.007                              | FYN binding protein                         | Fyb            | 289 $\pm$ 88    | 114 $\pm$ 5             | 105 $\pm$ 11  | 114 $\pm$ 5     |
| 2.5                             | 0.025                              | toll-like receptor 7                        | Tlr7           | 240 $\pm$ 84    | 96 $\pm$ 17             | 101 $\pm$ 17  | 96 $\pm$ 17     |
| 2.5                             | 0.002                              | serine peptidase inhibitor, clade Aalpha-1  | Serpina10      | 217 $\pm$ 31    | 87 $\pm$ 22             | 78 $\pm$ 14   | 87 $\pm$ 22     |
| 2.5                             | 0.001                              | mannose receptor, C type 1                  | Mrc1           | 376 $\pm$ 95    | 153 $\pm$ 6             | 143 $\pm$ 6   | 153 $\pm$ 6     |
| 2.4                             | 0.004                              | complement component 3a receptor 1          | C3ar1          | 633 $\pm$ 163   | 260 $\pm$ 31            | 216 $\pm$ 15  | 260 $\pm$ 31    |
| 2.4                             | 0.015                              | aldehyde dehydrogenase family 1, A2         | Aldh1a2        | 506 $\pm$ 212   | 211 $\pm$ 14            | 227 $\pm$ 36  | 211 $\pm$ 14    |
| 2.4                             | 0.022                              | lymphocyte antigen 86                       | Ly86           | 601 $\pm$ 201   | 253 $\pm$ 17            | 223 $\pm$ 31  | 253 $\pm$ 17    |
| 2.4                             | 0.008                              | chemokine (C-C motif) ligand 6              | Ccl6           | 299 $\pm$ 88    | 126 $\pm$ 23            | 100 $\pm$ 1   | 126 $\pm$ 23    |
| 2.4                             | 0.004                              | CD68 antigen                                | Cd68           | 425 $\pm$ 135   | 179 $\pm$ 21            | 123 $\pm$ 6   | 179 $\pm$ 21    |
| 2.3                             | 0.021                              | toll-like receptor 13                       | Tlr13          | 122 $\pm$ 44    | 52 $\pm$ 5              | 41 $\pm$ 2    | 52 $\pm$ 5      |
| 2.3                             | 0.001                              | chloride channel calcium activated 2        | Clca2          | 311 $\pm$ 73    | 133 $\pm$ 10            | 82 $\pm$ 3    | 133 $\pm$ 10    |
| 2.3                             | 0.008                              | integrin alpha M                            | Itgam          | 177 $\pm$ 53    | 76 $\pm$ 4              | 63 $\pm$ 2    | 76 $\pm$ 4      |

**Supplement Table 2:** 50 transcripts most increased in OVE-ACKR2 kidney compared to OVE kidney among all OVE-ACKR2 transcripts significantly different from OVE by ANOVA  $P \leq 0.05$ . Values are the average signal  $\pm$ SEM,  $n=3$ .

| RATIO<br>OVE /<br>OVE-<br>ACKR2 | p-value<br>OVE vs<br>OVE-<br>ACKR2 | gene_assignment                                | Gene<br>Symbol | OVE<br>signal  | OVE-<br>ACKR2<br>signal | FVB<br>signal  | ACKR2<br>signal |
|---------------------------------|------------------------------------|------------------------------------------------|----------------|----------------|-------------------------|----------------|-----------------|
| 0.23                            | 0.007                              | serine peptidase inhibitor, clade A 6          | Serpina6       | 612 $\pm$ 480  | 2661 $\pm$ 700          | 144 $\pm$ 43   | 277 $\pm$ 25    |
| 0.34                            | 0.005                              | interferon induced transmembrane protein 7     | Ifitm7         | 135 $\pm$ 24   | 392 $\pm$ 117           | 189 $\pm$ 49   | 367 $\pm$ 67    |
| 0.49                            | 0.020                              | deoxyribonuclease I                            | Dnase1         | 661 $\pm$ 84   | 1348 $\pm$ 367          | 788 $\pm$ 111  | 1013 $\pm$ 246  |
| 0.53                            | 0.005                              | 4-hydroxyphenylpyruvic acid dioxygenase        | Hpd            | 693 $\pm$ 47   | 1316 $\pm$ 222          | 1374 $\pm$ 294 | 1531 $\pm$ 145  |
| 0.53                            | 0.027                              | cytochrome P450, family 4a, polypeptide 12a    | Cyp4a12a       | 1242 $\pm$ 279 | 2343 $\pm$ 138          | 569 $\pm$ 184  | 433 $\pm$ 77    |
| 0.54                            | 0.035                              | insulin-like growth factor binding protein 1   | Igfbp1         | 147 $\pm$ 54   | 274 $\pm$ 42            | 195 $\pm$ 31   | 168 $\pm$ 39    |
| 0.57                            | 0.012                              | sal-like 2 (Drosophila)                        | Sall2          | 34 $\pm$ 4     | 60 $\pm$ 8              | 49 $\pm$ 11    | 39 $\pm$ 3      |
| 0.58                            | 0.047                              | small nucleolar RNA, C/D box 14C               | Snord14c       | 1372 $\pm$ 363 | 2355 $\pm$ 502          | 2305 $\pm$ 332 | 1550 $\pm$ 260  |
| 0.58                            | 0.004                              | B-cell leukemia/lymphoma 2                     | Bcl2           | 54 $\pm$ 9     | 93 $\pm$ 13             | 56 $\pm$ 3     | 77 $\pm$ 7      |
| 0.60                            | 0.037                              | olfactory receptor 1392                        | Olfr1392       | 78 $\pm$ 12    | 130 $\pm$ 33            | 80 $\pm$ 7     | 96 $\pm$ 5      |
| 0.60                            | 0.021                              | nephrocan                                      | Nepn           | 91 $\pm$ 24    | 151 $\pm$ 28            | 208 $\pm$ 20   | 286 $\pm$ 7     |
| 0.62                            | 0.001                              | solute carrier family 6                        | Slc6a20a       | 1154 $\pm$ 167 | 1873 $\pm$ 62           | 998 $\pm$ 15   | 1485 $\pm$ 120  |
| 0.63                            | 0.012                              | solute carrier family 8 sodium/calcium         | Slc8a1         | 918 $\pm$ 86   | 1466 $\pm$ 169          | 1158 $\pm$ 134 | 1647 $\pm$ 263  |
| 0.63                            | 0.000                              | Cbp/p300-interacting transactivator            | Cited1         | 184 $\pm$ 19   | 293 $\pm$ 19            | 237 $\pm$ 9    | 255 $\pm$ 9     |
| 0.63                            | 0.002                              | olfactory receptor 1393                        | Olfr1393       | 140 $\pm$ 7    | 222 $\pm$ 22            | 144 $\pm$ 20   | 160 $\pm$ 1     |
| 0.64                            | 0.000                              | kallikrein related-peptidase 14                | Klk14          | 28 $\pm$ 3     | 44 $\pm$ 2              | 40 $\pm$ 2     | 50 $\pm$ 3      |
| 0.64                            | 0.000                              | parvalbumin                                    | Pvalb          | 289 $\pm$ 23   | 451 $\pm$ 26            | 517 $\pm$ 25   | 603 $\pm$ 35    |
| 0.65                            | 0.033                              | aldo-keto reductase family 1, member D1        | Akr1d1         | 227 $\pm$ 37   | 350 $\pm$ 53            | 239 $\pm$ 32   | 224 $\pm$ 29    |
| 0.65                            | 0.000                              | DEAD (Asp-Glu-Ala-Asp) box polypeptide 43      | Ddx43          | 38 $\pm$ 2     | 59 $\pm$ 6              | 36 $\pm$ 2     | 58 $\pm$        |
| 0.65                            | 0.027                              | aldo-keto reductase family 1, member B7        | Akr1b7         | 52 $\pm$ 3     | 80 $\pm$ 18             | 62 $\pm$ 3     | 71 $\pm$ 6      |
| 0.65                            | 0.020                              | aquaporin 8                                    | Aqp8           | 56 $\pm$ 4     | 87 $\pm$ 18             | 51 $\pm$ 5     | 60 $\pm$ 5      |
| 0.66                            | 0.004                              | carnosine dipeptidase 1                        | Cndp1          | 558 $\pm$ 78   | 848 $\pm$ 41            | 969 $\pm$ 88   | 917 $\pm$ 44    |
| 0.67                            | 0.029                              | secreted phosphoprotein 2                      | Spp2           | 1310 $\pm$ 338 | 1955 $\pm$ 125          | 1642 $\pm$ 152 | 1953 $\pm$ 60   |
| 0.67                            | 0.031                              | olfactory receptor 459                         | Olfr459        | 19 $\pm$ 1     | 29 $\pm$ 2              | 26 $\pm$ 6     | 24 $\pm$ 2      |
| 0.68                            | 0.003                              | olfactory receptor 1022                        | Olfr1022       | 12 $\pm$ 1     | 17 $\pm$ 2              | 15 $\pm$ 1     | 16 $\pm$ 1      |
| 0.68                            | 0.048                              | MAS-related GPR, member H                      | Mrgprh         | 45 $\pm$ 8     | 67 $\pm$ 10             | 56 $\pm$ 3     | 63 $\pm$ 10     |
| 0.68                            | 0.011                              | zinc finger protein 616                        | Zfp616         | 9 $\pm$        | 14 $\pm$ 2              | 11 $\pm$ 1     | 11 $\pm$ 1      |
| 0.68                            | 0.035                              | procollagen C-endopeptidase enhancer 2         | Pcolce2        | 233 $\pm$ 24   | 342 $\pm$ 43            | 313 $\pm$ 54   | 285 $\pm$ 33    |
| 0.68                            | 0.048                              | cDNA sequence BC037703                         | BC037703       | 98 $\pm$ 15    | 144 $\pm$ 24            | 68 $\pm$ 9     | 74 $\pm$ 3      |
| 0.68                            | 0.003                              | guanylate cyclase 2f                           | Gucy2f         | 28 $\pm$ 2     | 40 $\pm$ 4              | 40 $\pm$ 2     | 41 $\pm$ 2      |
| 0.69                            | 0.016                              | transducin-like enhancer of split 2            | Tle2           | 190 $\pm$ 25   | 276 $\pm$ 9             | 293 $\pm$ 47   | 243 $\pm$ 21    |
| 0.69                            | 0.010                              | phosphatidylinositol glycan anchor synthesis Z | Pigz           | 319 $\pm$ 33   | 463 $\pm$ 61            | 200 $\pm$ 16   | 261 $\pm$ 17    |
| 0.69                            | 0.024                              | elongation factor RNA polymerase II-like 3     | EIf3           | 185 $\pm$ 8    | 269 $\pm$ 36            | 166 $\pm$ 9    | 210 $\pm$ 36    |
| 0.69                            | 0.009                              | vomer nasal 1 receptor 27                      | Vmn1r27        | 25 $\pm$ 3     | 37 $\pm$ 2              | 39 $\pm$ 4     | 31 $\pm$ 3      |
| 0.69                            | 0.015                              | transient receptor potential cation channel M  | Trpm6          | 325 $\pm$ 21   | 470 $\pm$ 60            | 481 $\pm$ 54   | 532 $\pm$ 51    |
| 0.69                            | 0.043                              | stimulated by retinoic acid gene 6             | Stra6          | 352 $\pm$ 25   | 509 $\pm$ 87            | 263 $\pm$ 36   | 343 $\pm$ 36    |
| 0.69                            | 0.009                              | Rhesus blood group-associated B glycoprotein   | Rhbg           | 556 $\pm$ 24   | 802 $\pm$ 23            | 818 $\pm$ 89   | 966 $\pm$ 125   |
| 0.69                            | 0.002                              | tRNA-yW synthesizing protein 3 homolog         | Tyw3           | 359 $\pm$ 39   | 517 $\pm$ 34            | 417 $\pm$ 18   | 518 $\pm$ 26    |
| 0.70                            | 0.047                              | betaine-homocysteine methyltransferase         | Bhmt           | 833 $\pm$ 35   | 1188 $\pm$ 151          | 1089 $\pm$ 191 | 1019 $\pm$ 130  |
| 0.70                            | 0.011                              | solute carrier family 13 sodium/sulfate        | Slc13a4        | 132 $\pm$ 12   | 187 $\pm$ 13            | 176 $\pm$ 6    | 166 $\pm$ 24    |
| 0.70                            | 0.044                              | renin 1 structural                             | Ren1           | 764 $\pm$ 88   | 1084 $\pm$ 220          | 1944 $\pm$ 67  | 2724 $\pm$ 95   |
| 0.71                            | 0.005                              | inosine 5'-phosphate dehydrogenase 2           | Impdh2         | 43 $\pm$ 3     | 61 $\pm$ 8              | 38 $\pm$ 1     | 46 $\pm$ 3      |
| 0.71                            | 0.027                              | aminoacylase 1                                 | Acy1           | 2527 $\pm$ 395 | 3575 $\pm$ 257          | 2807 $\pm$ 351 | 2692 $\pm$ 274  |
| 0.71                            | 0.014                              | testis expressed gene 19.1                     | Tex19.1        | 30 $\pm$ 3     | 43 $\pm$ 6              | 48 $\pm$ 4     | 53 $\pm$ 1      |
| 0.71                            | 0.015                              | glycerophosphodiester phosphodiesterase 3      | Gdpd3          | 1280 $\pm$ 215 | 1808 $\pm$ 112          | 1511 $\pm$ 119 | 1860 $\pm$ 134  |
| 0.71                            | 0.022                              | solute carrier family 34 sodium phosphate 3    | Slc34a3        | 1796 $\pm$ 321 | 2522 $\pm$ 167          | 2115 $\pm$ 210 | 2461 $\pm$ 145  |
| 0.71                            | 0.012                              | phosphatidylinositol 3-kinase, C2              | Pik3c2g        | 789 $\pm$ 117  | 1107 $\pm$ 49           | 1287 $\pm$ 104 | 1356 $\pm$ 84   |
| 0.71                            | 0.015                              | Fc receptor, IgA, IgM, high affinity           | Fcamr          | 76 $\pm$ 3     | 106 $\pm$ 12            | 182 $\pm$ 21   | 197 $\pm$ 17    |
| 0.71                            | 0.000                              | defensin beta 4                                | Defb4          | 12 $\pm$ 1     | 16 $\pm$ 1              | 14 $\pm$ 1     | 15 $\pm$ 1      |
| 0.72                            | 0.002                              | proteasome, beta type 7 pseudogene             | Gm6787         | 46 $\pm$ 4     | 64 $\pm$ 4              | 59 $\pm$ 3     | 63 $\pm$ 2      |
